# Supplementary material for: A Rapid Crosslinkable Maleimide-Modified Hyaluronic Acid and Gelatin Hydrogel Delivery System for Regenerative Applications
Source: PubMed Central journal article supplement (PMC7931058; doi:10.3390/gels7010013), 2021-02-01
Supplement: gels-07-00013-s001.pdf [file gels-07-00013-s001.pdf]

***Supplemental Materials for:***

**A Rapid Crosslinkable Maleimide-modified Hyaluronic Acid and Gelatin Hydrogel Delivery System for Regenerative Applications**

Kyung Min Yoo<sup>1</sup>, Sean Murphy<sup>1,\*</sup>, Aleksander Skardal<sup>2,3,\*</sup>,

<sup>1</sup>Wake Forest Institute for Regenerative Medicine, Wake Forest School of Medicine, 391 Technology Way, Winston-Salem, NC, 27101, USA.

<sup>2</sup>Department of Biomedical Engineering, The Ohio State University, Fontana Labs, 140 W. 19<sup>th</sup> Ave, Columbus, OH, 43210, USA.

<sup>3</sup>The Ohio State University and Arthur G. James Comprehensive Cancer Center, Columbus, Ohio, 43210, USA

\*Correspondence:

Aleksander Skardal, PhD  
Department of Biomedical Engineering,  
The Ohio State University,  
3022 Fontana Labs,  
140 W. 19<sup>th</sup> Ave,  
Columbus, OH, 43210, USA.

Sean V. Murphy, PhD  
Wake Forest Institute for Regenerative Medicine,  
Wake Forest School of Medicine,  
391 Technology Way,  
Winston-Salem, NC, 27101, USA.

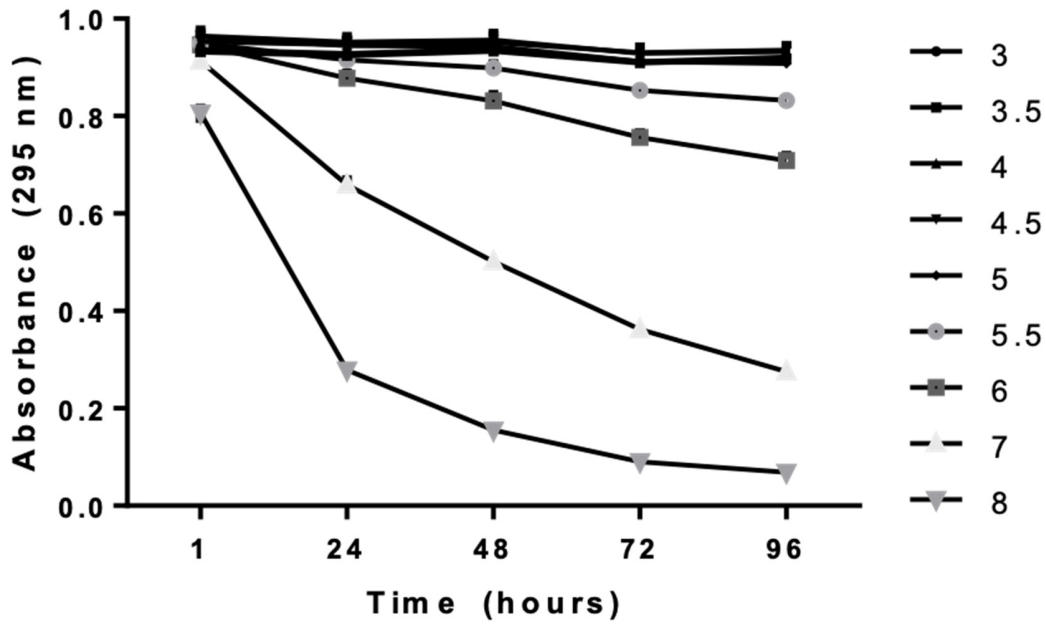

**Supplementary Figure 1.** Sensitivity of maleimides at various pH conditions (pH 3-8) using UV-vis Spectroscopy. Absorbances (n=3) per condition were measured at 295 nm.

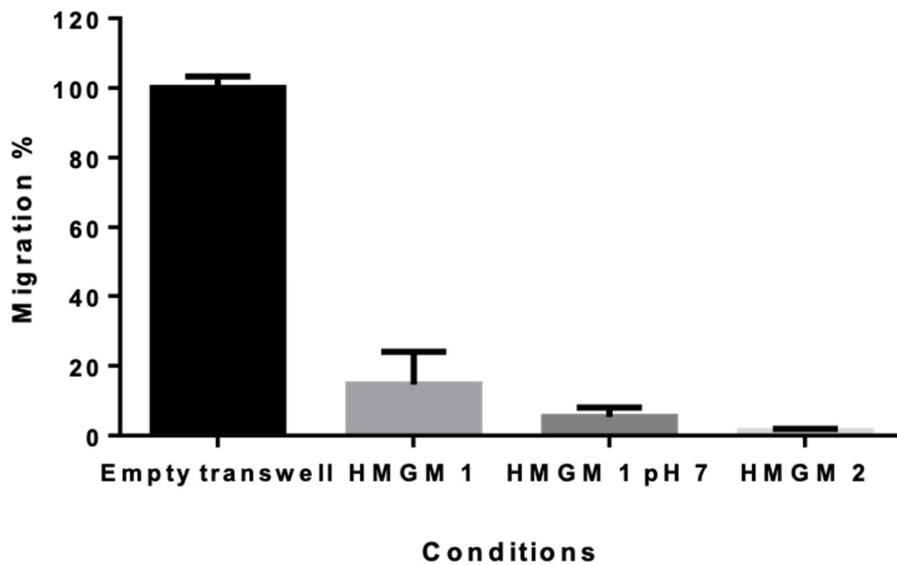

**Supplementary Figure 2.** Mechanical Barrier Assay with HMGM hydrogels. Migration percentages of FITC-dextran solution passed with hydrogels were calculated (n=3).

| Hydrogel | Components       | Final Conc. (w/v %) |
|----------|------------------|---------------------|
| HMGM 1   | HA-Mal (100 kDa) | 1.0%                |
|          | Gel-Mal (175 g)  | 0.4%                |
|          | PEGDSH (3.4 kDa) | 0.25%               |
| HMGM 2   | HA-Mal (200 kDa) | 0.5%                |
|          | Gel-Mal (300 g)  | 0.4%                |
|          | PEGDSH (3.4 kDa) | 0.125%              |

**Supplementary Table 1.** Hydrogel composition.

| HA-Mal MW (kDa) | HA-Mal Conc. (% w/v) | Gel-Mal bloom strength (g) | Gel-Mal Conc. (% w/v) | PEG Geometry | PEG MW (kDa) | PEG Conc (% w/v) | Stiffness Score (1-5) | Easily Extrudable | Self Standing |
|-----------------|----------------------|----------------------------|-----------------------|--------------|--------------|------------------|-----------------------|-------------------|---------------|
| 100             | 1                    | 175                        | 1.6                   | 2 arm        | 3.4          | 0.5              | 3.5                   | x                 | x             |
| 100             | 1                    | 175                        | 1.6                   | 2 arm        | 3.4          | 1                | 3.25                  | x                 | x             |
| 100             | 1                    | 175                        | 1.6                   | 4 arm        | 10           | 1                | 3.75                  |                   | x             |
| 100             | 2                    | 175                        | 1.6                   | 2 arm        | 3.4          | 0.5              | 4                     | x                 | x             |
| 100             | 2                    | 300                        | 1.6                   | 2 arm        | 3.4          | 0.5              | 4                     | x                 | x             |
| 200             | 1                    | 175                        | 1.6                   | 2 arm        | 3.4          | 0.5              | 4                     | x                 | x             |
| 200             | 1                    | 175                        | 1.6                   | 4 arm        | 10           | 1                | 3.25                  |                   | x             |
| 200             | 1                    | 175                        | 1.6                   | 2 arm        | 3.4          | 0.5              | 4                     | x                 | x             |
| 200             | 1                    | 300                        | 1.6                   | 2 arm        | 3.4          | 0.5              | 4                     | x                 | x             |
| 200             | 1                    | 300                        | 1.6                   | 2 arm        | 3.4          | 0.5              | 4                     | x                 | x             |

**Supplementary Table 2.** Hydrogel formulations tested for ability to self-stand and for ease of extrusion. “x” indicates a positive result in terms of extrusion or ability for self-support.

|        | Swelling % |          |          |          |          |          |
|--------|------------|----------|----------|----------|----------|----------|
|        | t=0        | t=1      | t=2      | t=3      | t=6      | t=24     |
| HMGM 1 | 0          | 10 ± 3%  | 14 ± 4%  | 22 ± 13% | 25 ± 12% | 32 ± 13% |
| HMGM 2 | 0          | 23 ± 19% | 27 ± 13% | 21 ± 10% | 24 ± 11% | 26 ± 9%  |

**Supplementary Table 3.** Swelling table.
